# Supplementary material for: Online Survey for the Assessment of Generic Health Literacy among Adolescents in Germany (GeKoJu): Study Protocol
Source: PubMed Central journal article supplement (PMC7084343; doi:10.3390/ijerph17051518), 2020-02-27
Supplement: ijerph-17-01518-s001.pdf [file ijerph-17-01518-s001.pdf]

**Additional file 1.** Measurement Health Literacy Among Adolescents Questionnaire (MOHLAA-Q)

**Scale A. Dealing with health-related information**

| <i>How easy/difficult is it for you to . . . ?</i>                                                                                                                                                   | very<br>easy<br>(4)   | easy<br>(3)           | difficult<br>(2)      | very<br>difficult<br>(1) |
|------------------------------------------------------------------------------------------------------------------------------------------------------------------------------------------------------|-----------------------|-----------------------|-----------------------|--------------------------|
| 1. <b>...find information about what to do when you feel ill to make yourself get better?</b>                                                                                                        | <input type="radio"/> | <input type="radio"/> | <input type="radio"/> | <input type="radio"/>    |
| 2. <b>...understand a medication leaflet?</b>                                                                                                                                                        | <input type="radio"/> | <input type="radio"/> | <input type="radio"/> | <input type="radio"/>    |
| 3. <b>...judge whether information about medication in the media is credible?</b><br>media: internet, TV, radio, press                                                                               | <input type="radio"/> | <input type="radio"/> | <input type="radio"/> | <input type="radio"/>    |
| 4. <b>...follow the instructions of your doctor or pharmacist?</b>                                                                                                                                   | <input type="radio"/> | <input type="radio"/> | <input type="radio"/> | <input type="radio"/>    |
| 5. <b>...find information about how you can deal with mental problems?</b> e.g., permanent stress, depression, being bullied, an eating disorder                                                     | <input type="radio"/> | <input type="radio"/> | <input type="radio"/> | <input type="radio"/>    |
| 6. <b>...understand how you can protect yourself from sexually transmitted diseases?</b><br>By sexually transmitted diseases we mean diseases such as HIV/AIDS, chlamydia infection, or herpes       | <input type="radio"/> | <input type="radio"/> | <input type="radio"/> | <input type="radio"/>    |
| 7. <b>...judge whether you can trust media when they warn you of risks to your health?</b>                                                                                                           | <input type="radio"/> | <input type="radio"/> | <input type="radio"/> | <input type="radio"/>    |
| 8. <b>...implement recommendations that protect you during sport, in your leisure time and in traffic?</b><br>(e.g., wearing a helmet or knee or arm protectors, observing road traffic regulations) | <input type="radio"/> | <input type="radio"/> | <input type="radio"/> | <input type="radio"/>    |
| 9. <b>...find information about healthy behavior such as exercise and nutrition?</b>                                                                                                                 | <input type="radio"/> | <input type="radio"/> | <input type="radio"/> | <input type="radio"/>    |
| 10. <b>...understand information on food packaging?</b>                                                                                                                                              | <input type="radio"/> | <input type="radio"/> | <input type="radio"/> | <input type="radio"/>    |
| 11. <b>...judge how what you do daily affects your health?</b><br>e.g., eating, drinking, exercise, relaxation, body care                                                                            | <input type="radio"/> | <input type="radio"/> | <input type="radio"/> | <input type="radio"/>    |

...get involved in promoting a healthy environment?

12. e.g., less noise and less traffic, better air quality, more parks and sports grounds

**Scale B. Communication and interaction skills**

| <i>To what extent do you agree with the following sentences?</i> |                                                                                                                         | strongly agree        | somewh at agree       | somewh at disagree    | strongly disagree     |
|------------------------------------------------------------------|-------------------------------------------------------------------------------------------------------------------------|-----------------------|-----------------------|-----------------------|-----------------------|
|                                                                  |                                                                                                                         | (4)                   | (3)                   | (2)                   | (1)                   |
| 13.                                                              | <b>During my last visit to the doctor, I asked all the questions that interested me.</b>                                | <input type="radio"/> | <input type="radio"/> | <input type="radio"/> | <input type="radio"/> |
| 14.                                                              | <b>I chat with my friends about how one can avoid unhealthy behavior e.g., smoking, drinking alcohol over the limit</b> | <input type="radio"/> | <input type="radio"/> | <input type="radio"/> | <input type="radio"/> |
| 15.                                                              | <b>If my friends or siblings have questions about health, I can help them.</b>                                          | <input type="radio"/> | <input type="radio"/> | <input type="radio"/> | <input type="radio"/> |
| 16.                                                              | <b>It is easy for me to talk with my parents about health topics.</b>                                                   | <input type="radio"/> | <input type="radio"/> | <input type="radio"/> | <input type="radio"/> |

**Scale C. Attitudes toward one's own health and health information**

|                                                                |                                                                            | not at all            | little                | moderate                  | strong                | very strong           |
|----------------------------------------------------------------|----------------------------------------------------------------------------|-----------------------|-----------------------|---------------------------|-----------------------|-----------------------|
|                                                                |                                                                            | (1)                   | (2)                   | (3)                       | (4)                   | (5)                   |
| 17.                                                            | How much in general do you pay attention to your health?                   | <input type="radio"/> | <input type="radio"/> | <input type="radio"/>     | <input type="radio"/> | <input type="radio"/> |
| <i>To what extent do you agree to the following sentences?</i> |                                                                            | strongly agree        | some what agree       | neither agree or disagree | some what disagree    | strongly disagree     |
|                                                                |                                                                            | (5)                   | (4)                   | (3)                       | (2)                   | (1)                   |
| 18.                                                            | <b>I seek advice from others when I am ill.</b>                            | <input type="radio"/> | <input type="radio"/> | <input type="radio"/>     | <input type="radio"/> | <input type="radio"/> |
| 19.                                                            | <b>It is up to me to protect myself from diseases.</b>                     | <input type="radio"/> | <input type="radio"/> | <input type="radio"/>     | <input type="radio"/> | <input type="radio"/> |
| 20.                                                            | <b>I know what I have to do to make myself feel comfortable.</b>           | <input type="radio"/> | <input type="radio"/> | <input type="radio"/>     | <input type="radio"/> | <input type="radio"/> |
| 21.                                                            | <b>It is important to me to inform myself about health-related topics.</b> | <input type="radio"/> | <input type="radio"/> | <input type="radio"/>     | <input type="radio"/> | <input type="radio"/> |

### Scale D. Health-related knowledge

1. **How often should a young person at your age be physically active?** *Only one answer is correct.*

- Up to two hours of sport per week is sufficient (0)
- Physical education lessons at school are sufficient (0)
- About an hour every day while one's works up a sweat, is sufficient (1)
- Three times a week exercise is sufficient (0)
- Do not know (0)

2. **How does it affect the body if you regularly drink a lot of alcohol?** *Only one answer is correct.*

- Almost all organs are damaged (1)
- Only the liver and brain are damaged (0)
- It depends on how much the body can tolerate (0)
- The lung volume decreases (0)
- Do not know (0)

3. **What are the health effects for young people of consuming cannabis (marijuana, hashish) often?** *Only one answer is correct.*

- Poorer learning and memory skills (1)
- Permanent brain damage (0)
- Hair loss (0)
- Only physical dependence (0)
- Do not know (0)

4. **What is NOT one of the possible effects of smoking?** *Only one answer is correct.*

- Tooth loss (0)
- Skin aging (0)
- Nearsightedness (1)
- Decreased muscular strength (0)
- Do not know (0)

5. **How can small burns be treated?** *Only one answer is correct.*
- Sprinkle flour on the wound (0)
  - Cool for 10 minutes under lukewarm water (1)
  - Always pierce blisters from burns (0)
  - Cool only with sterile saline solution (0)
  - Do not know (0)
6. **Which ingredient is contained in the highest amount in a cocoa drink powder with the ingredients listed on the package as follows: sugar, dextrose, low-fat cocoa powder, emulsifier agent (lecithin), salt?** *Only one answer is correct.*
- Salt (0)
  - Dextrose (0)
  - Sugar (1)
  - Cocoa powder (0)
  - Do not know (0)
7. **We want to know if you know what your rights are. One of the following sentences is WRONG. Which sentence is that?** *Only one answer is correct.*
- I can disagree to a major medical surgery, even if my parents have agreed. (0)
  - I have to agree before my doctor will inform my parents about my treatment. (0)
  - I have the right for the doctor to inform me about the advantages and disadvantages of my treatment. (0)
  - I have no rights. (1)
  - Do not know (0)
8. **How can HIV/AIDS be transmitted?** *Only one answer is correct*
- Kissing (0)
  - Skin contact such as shaking hands (0)
  - Insect bites (0)
  - None of the given answers is correct (1)
  - Do not know (0)
